# Supplementary material for: The role of association of ions in ionic liquid/molecular solvent mixtures on metal extraction
Source: Royal Society of Chemistry journal article supplement (doi:10.1039/c7cp05886a), 2017-01-01

## Supplementary Material

### Role of the association of ions in ionic liquid/molecular solvent mixtures onto metal extraction

J.-M. Andanson<sup>1,\*</sup>, N. Papaiconomou<sup>2,3,4</sup>, P.A. Cable<sup>1</sup>, M. Traïkia<sup>1</sup>, I. Billard<sup>3,4</sup>, P. Husson<sup>1</sup>

<sup>1</sup> Université Clermont Auvergne, CNRS, SIGMA Clermont, Institut de Chimie de Clermont-Ferrand, F-63000 Clermont-Ferrand, France

<sup>2</sup> Univ. Savoie, LEPMI, F-73000, Chambéry, France

<sup>3</sup> Univ. Grenoble-Alpes, LEPMI, F-38000, Grenoble, France

<sup>4</sup> CNRS, LEPMI, F-38000, Grenoble, France

\* Corresponding author: [j-michel.andanson@uca.fr](mailto:j-michel.andanson@uca.fr)

1) Table 1-SI: Electrical conductivity, density and viscosity of BA + [C<sub>1</sub>C<sub>4</sub>Im][NTf<sub>2</sub>], [C<sub>1</sub>C<sub>8</sub>Im][NTf<sub>2</sub>], [C<sub>8</sub>Pyr][NTf<sub>2</sub>] and [C<sub>1</sub>C<sub>8</sub>Pyrro][NTf<sub>2</sub>] at 298.15K as a function of the mole fraction of BA.

2) Figure 1-SI: Infrared spectra BA + [C<sub>1</sub>C<sub>8</sub>Im][NTf<sub>2</sub>] mixture at 298.15K.

3) Figure 2-SI: Infrared spectra BA + [C<sub>1</sub>C<sub>8</sub>Pyrro][NTf<sub>2</sub>] mixture at 298.15K.

Table 1-SI: Electrical conductivity, density and viscosity of BA + [C<sub>1</sub>C<sub>4</sub>Im][NTf<sub>2</sub>], BA + [C<sub>1</sub>C<sub>8</sub>Im][NTf<sub>2</sub>], BA + [C<sub>8</sub>Pyr][NTf<sub>2</sub>] and BA + [C<sub>1</sub>C<sub>8</sub>Pyrro][NTf<sub>2</sub>] at 298.15K as a function of the mole fraction of BA.

|                                                          | $x_{BA}$ | Conductivity<br>(mS.cm <sup>-1</sup> ) | Density<br>(g/cm <sup>3</sup> ) | Viscosity<br>(mPa.s) |
|----------------------------------------------------------|----------|----------------------------------------|---------------------------------|----------------------|
| [C <sub>1</sub> C <sub>8</sub> Im][NTf <sub>2</sub> ]    | 0        | 1.310                                  | 1.320355                        | 90.324               |
|                                                          | 0.2622   | 1.94                                   | 1.274569                        | 44.20                |
|                                                          | 0.5001   | 3.07                                   | 1.205477                        | 17.10                |
|                                                          | 0.7054   | 4.07                                   | 1.119730                        | 6.459                |
|                                                          | 0.7503   | 4.14                                   | 1.094489                        | 4.987                |
|                                                          | 0.7970   | 4.06                                   | 1.064685                        | 3.474                |
|                                                          | 0.8503   | 3.61                                   | 1.026588                        | 2.528                |
|                                                          | 0.8976   | 2.79                                   | 0.984994                        | 1.730                |
|                                                          | 0.9305   | 1.9                                    | 0.954560                        | 1.308                |
| [C <sub>1</sub> C <sub>4</sub> Im][NTf <sub>2</sub> ]    | 0        | 3.9                                    | 1.436527                        | 50.22                |
|                                                          | 0.2414   | 5.29                                   | 1.367879                        | 26.00                |
|                                                          | 0.4810   | 6.7                                    | 1.275394                        | 11.88                |
|                                                          | 0.6824   | 7.25                                   | 1.168238                        | 4.903                |
|                                                          | 0.7372   | 7.04                                   | 1.128113                        | 3.418                |
|                                                          | 0.7923   | 6.54                                   | 1.086014                        | 2.648                |
|                                                          | 0.8427   | 5.35                                   | 1.043935                        | 2.043                |
|                                                          | 0.8928   | 3.73                                   | 0.996443                        | 1.470                |
|                                                          | 0.9456   | 1.63                                   | 0.941054                        | 1.092                |
| [C <sub>1</sub> C <sub>8</sub> Pyrro][NTf <sub>2</sub> ] | 0        | 0.82                                   | 1.289012                        | 138.17               |
|                                                          | 0.2589   | 1.45                                   | 1.253504                        | 51.31                |
|                                                          | 0.4969   | 2.56                                   | 1.183625                        | 17.37                |
|                                                          | 0.6954   | 3.53                                   | 1.107485                        | 7.102                |
|                                                          | 0.7499   | 3.61                                   | 1.082117                        | 5.068                |
|                                                          | 0.8031   | 3.55                                   | 1.048070                        | 3.420                |
|                                                          | 0.8484   | 3.26                                   | 1.017616                        | 2.500                |
|                                                          | 0.9016   | 2.42                                   | 0.975724                        | 1.732                |
|                                                          | 0.9431   | 1.31                                   | 0.937732                        | 1.202                |
| [C <sub>8</sub> Pyr][NTf <sub>2</sub> ]                  | 0        | 0.97                                   | 1.329012                        | 104.14               |
|                                                          | 0.2556   | 1.66                                   | 1.279420                        | 49.62                |
|                                                          | 0.5010   | 2.71                                   | 1.208740                        | 18.43                |
|                                                          | 0.6984   | 3.71                                   | 1.124141                        | 6.824                |
|                                                          | 0.7522   | 3.84                                   | 1.091885                        | 4.873                |
|                                                          | 0.7996   | 3.77                                   | 1.061317                        | 3.573                |
|                                                          | 0.8487   | 3.33                                   | 1.021783                        | 2.465                |
|                                                          | 0.8996   | 2.58                                   | 0.984050                        | 1.732                |
|                                                          | 0.9493   | 1.24                                   | 0.934890                        | 1.227                |

Figure 1-SI: Infrared spectra BA + [C<sub>1</sub>C<sub>8</sub>Im][NTf<sub>2</sub>] mixture at 298.15K. Spectrum of pure IL is in red, pure BA in green and spectra of mixtures are in the black.

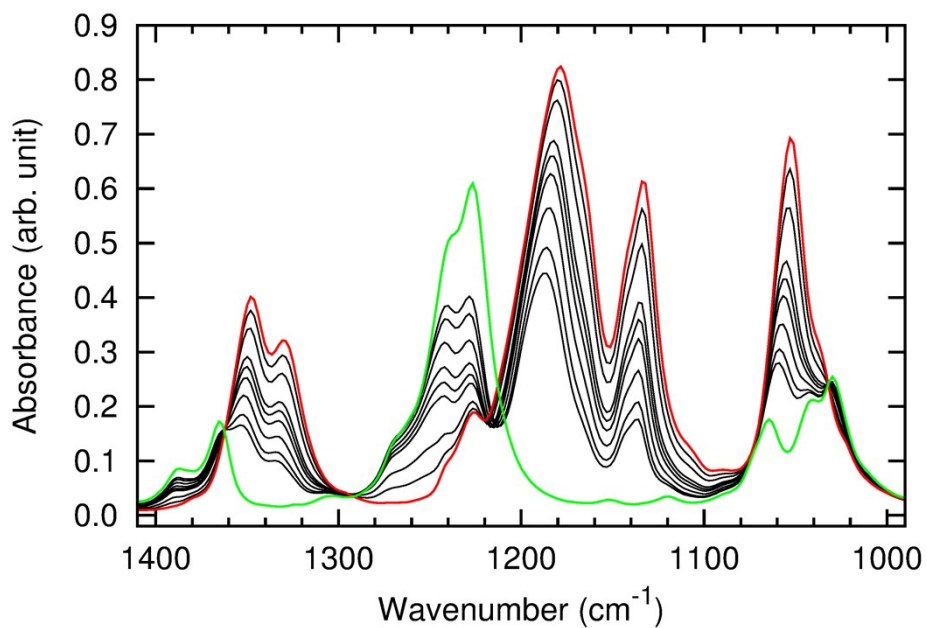

Figure 2-SI: Infrared spectra BA + [C<sub>1</sub>C<sub>8</sub>Pyrrro][NTf<sub>2</sub>] mixture at 298.15K. Spectrum of pure IL is in red, pure BA in green and spectra of mixtures are in the black.

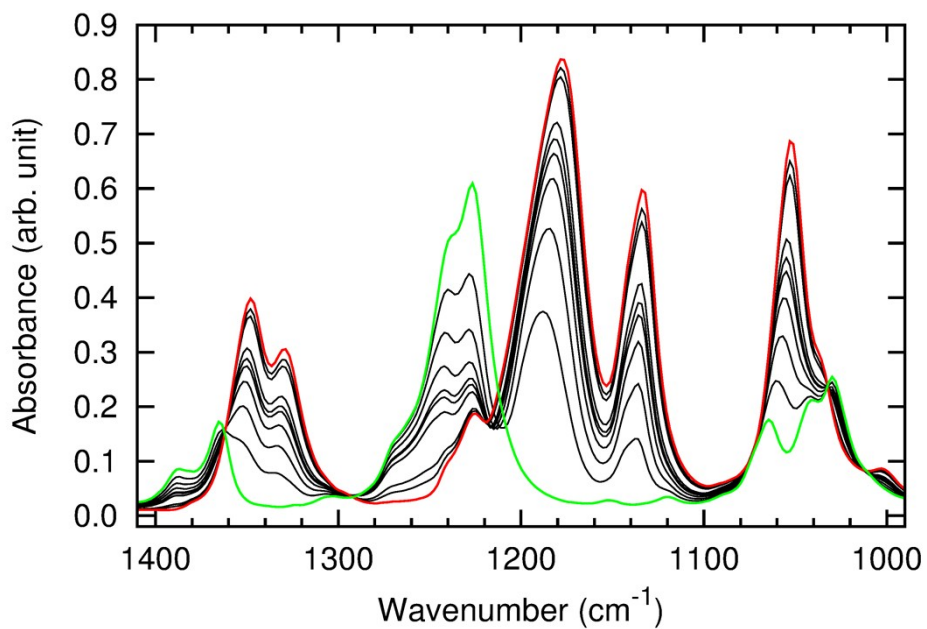

Supplement: c7cp05886a1.pdf [file c7cp05886a1.pdf]
